# Supplementary material
Source: PubMed Central journal article supplement (PMC2785987)
Supplement: pp.109.141911_1.pdf [file pp.109.141911_1.pdf]

**Table S1:** Primers used for QPCR analysis

| Gene              | Arabidopsis Genome Initiative ID | Forward Primer (5'-3')     | Reverse Primer (5'-3')      |
|-------------------|----------------------------------|----------------------------|-----------------------------|
| <i>ACT2</i>       | At1g49240                        | CCGAGCAGCATGAAGATTAAG      | CATACTCTGCCTTAGAGATCCACA    |
| <i>CER1</i>       | AT1G02205                        | AAGGATGGGAAATGCATGAG       | TGATGTGGAAGGAGGAGAGG        |
| <i>CER2</i>       | AT4G24510                        | GGCGAAACAACACGAATG         | TCGGATATCCAACCATTTTC        |
| <i>CER3/WAX2</i>  | At5g57800                        | GGGAAGCAGCCATGAAGTAT       | TTCTGCTTGCATCTCCTTT         |
| <i>CER4</i>       | At4g33790                        | ACCGTGGACCAACAAGAAG        | GCAATCAAGTAGCGTATGGTCA      |
| <i>CER5/WBC12</i> | At1g51500                        | TTTCTTAATTTGTTTTGCACATACG  | TTCTCCAAAATAACAATGCTGAA     |
| <i>WBC11</i>      | At1g17840                        | TAGCACGCAGAAGGATGAAG       | CCATCTGTTTCGTGTAGCAATG      |
| <i>CER7</i>       | At3g60500                        | CCCGTTACTAAGTCATCGAGCA     | CCCTAATTCTCCGGTTACTTCC      |
| <i>KCS6/CER6</i>  | At1g68530                        | TCTAGCTCGGTGAAGCTCAAG      | AAGCTCAACGGCGACAATAG        |
| <i>KCR</i>        | At1g67730                        | CTACTTCTCCGACCATCCA        | CTGGGTTACGAGCAACGAGT        |
| <i>ECR/CER10</i>  | At3g55360                        | CTGGAGCTTTGGTGCTTACA       | CTGGGGTCCCTCAGATTCTT        |
| <i>LACS1</i>      | At2g47240                        | GCTCAAGAATCGGAGGAACA       | CACACACATCATCGCAACAC        |
| <i>LACS2</i>      | At1g49430                        | GCAAAGAGGTCCATGGCATA       | GATGAGAGGATCCGAACACAA       |
| <i>LACS3</i>      | At1g64400                        | TGAAAAGACCTCAGCTTCTCAA     | AAACCTGAGAGATTTGTCCAACA     |
| <i>ATT1</i>       | At4g00360                        | GAGAAACGACGTCGTTGTTCTTAACG | AACCCGAGAAGCTGCATTACACGG    |
| <i>GPAT4</i>      | At1g01610                        | TCCTGAAGGCACAACGTGTA       | ACATCCCTTGCTTGCAGTTC        |
| <i>GPAT8</i>      | At4g00400                        | AATGACTGTCAACGTTGGTGGCAAG  | GCGAGTAAGTTTCGGTGCATTCTGAAG |
| <i>LCR</i>        | At2g45970                        | TGAAATCGACTTGGGGAGAG       | GCCAGATCCTTACCCAGACA        |
| <i>HTH</i>        | At1g72970                        | TTCTTCGGGAGAGACTTGA        | CCAACACAATTCACAAACAGA       |
| <i>BDG</i>        | At1g64670                        | CACATTAGCCGCACAGTCAG       | TCAAGTACGTTCCGCATCCTG       |
| <i>SHN2</i>       | At5g11190                        | CGCTAAGACCAATTTCCCTGT      | GCGTTCAAAAAGCTCAGATAATG     |
| <i>SHN3</i>       | At5g25390                        | GAAGATGATCAAATGGCGATG      | TACCCTCGATTATTATTAACCTCA    |
| <i>MYB30</i>      | At3g28910                        | CAACGTCTTCTCTGCTGAA        | GTCTTCGGCGAGTTTTTCAC        |
| <i>MYB41</i>      | At4g28110                        | CTTAGACTCGCTCATGTCAACG     | CTTCCGGAATTCCAAAGTCG        |
| <i>ACR4</i>       | At3g59420                        | TCGAGATCCTAAGCGGAAGA       | GGGTCCAAGAGTGCCTTTAT        |
